# Supplementary material for: LINC00636 promotes lymph node metastasis and cervical cancer through targeting NM23
Source: PubMed Central journal article supplement (PMC7601350; doi:10.1042/bsr20200367), 2020-10-30
Supplement: BSR-2020-0367_supp.pdf [file BSR-2020-0367_supp.pdf]

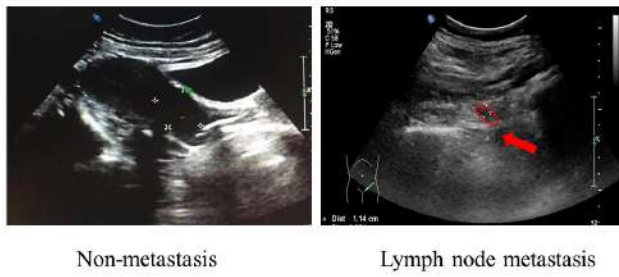

Figure S1

**Figure S1.** Cervical cancer with or without lymph node metastasis shown in doppler ultrasound graph.
